1 Balancing skill against difficulty - behavior, heart rate and heart rate variability of shelter dogs during  
2 two different introductions of an interactive game

3 Arhant, Christine<sup>a\*</sup>, Altrichter, Bernadette<sup>a</sup>; Lehenbauer, Sandra<sup>a,b</sup>; Waiblinger, Susanne<sup>a</sup>; Schmied-  
4 Wagner, Claudia<sup>b</sup>, Yee, Jason<sup>a</sup>

5 <sup>a</sup> Institute of Animal Welfare Science, University of Veterinary Medicine Vienna, Veterinärplatz 1,  
6 1210 Wien, Austria

7 <sup>b</sup> Specialist Unit for Animal Husbandry and Animal Welfare, Veterinärplatz 1, 1210 Wien, Austria

8 \*Corresponding Author: [Christine.Arhant@vetmeduni.ac.at](mailto:Christine.Arhant@vetmeduni.ac.at)

9 Emails of all authors: b.altrichter@gmail.com, sandra.lehenbauer@tierschutzkonform.at,  
10 Susanne.Waiblinger@vetmeduni.ac.at, claudia.schmied-wagner@tierschutzkonform.at,  
11 Jason.Yee@vetmeduni.ac.at

12

13 Declarations of interest: Schmied-Wagner C., Arhant C. and Altrichter B. were involved in awarding  
14 the 'Animal Welfare Label' to the interactive game used in the study. This process was completed  
15 before the start of the study and did not influence it.

16

17 Abstract

18 Interactive games may boost positive well-being by combining the benefits of rewards with cognitive  
19 and social enrichment. While a gradual introduction to the game can promote greater learning and  
20 skill, a hasty introduction can lead to low success and frustration. Here, we examine two methods of  
21 introducing an interactive game to dogs (*Canis lupus familiaris*) to test whether they elicit differences  
22 in success rate, stress-related behavior, and autonomic regulation of the heart.

23 Twenty-eight dogs living in shelters were given the opportunity to play with an interactive game that  
24 consists of four boxes with different opening mechanisms. Dogs were introduced to the interactive  
25 game in one of two ways: gradually vs hastily. Gradual introduction consisted of allowing the dog to  
26 first play a partial (2 out of 4 boxes) version of the game with a human experimenter demonstrating  
27 the opening mechanism of the boxes twice, followed by exposure to the complete game. Hasty  
28 introduction consisted of the same procedures but presented in a different order, with the complete  
29 game presented before the partial version. Dog behavior was obtained via video recordings and pre-  
30 and post-game mean HR, RMSSD, SDNN, RMSSD/SDNN ratio were assessed using R-R intervals  
31 obtained with a Polar heart rate monitor (RS800CX). Linear mixed effects analyses (LMM) were  
32 calculated for success and behavior component scores and for change from pre- to post-game period  
33 in HR & HRV variables. In addition, HR and HRV parameters were analyzed with Pearson correlations.

34 Dogs introduced to the game in a gradual manner had a significantly higher rate of success compared  
35 to dogs introduced in a hasty manner (LMM:  $p < 0.001$ ). Dogs introduced to the game gradually also  
36 displayed less stress related-behavior, e.g. displaying lower scores for the arousal ( $p < 0.001$ ) and  
37 displacement ( $p < 0.001$ ) components. Correlation analysis revealed a negative correlation between  
38 HR and RMSSD during baseline in all dogs (pre-game, day 1: gradual:  $r = -0.52$ ; hasty:  $r = -0.72$ ) that  
39 gradually transformed into a strong positive correlation in the gradual introduction group (post-  
40 game, day 2:  $r = 0.78$ ), whereas it remained negative over all evaluation periods in the hasty  
41 introduction group (post-game, day 2:  $r = -0.83$ ).

42 Overall, our findings on success rate, dog behavior, and HR/HRV suggest that the way a moderately  
43 difficult game is introduced plays a major role in determining how the experience of game play is  
44 perceived. Our results are consistent with the hypothesis that gradual introduction including  
45 demonstration promotes an enjoyable experience characterized by greater likelihood of reward, less  
46 stress-related behavior, and a physiological profile that may involve activation of both sympathetic  
47 and parasympathetic branches of the autonomic nervous system. We suggest that this may be a  
48 physiologic signature of successful achievement and that a learning experience in which skills are  
49 balanced against difficulty promote pleasant emotional states.

50

51 Keywords: dogs; human-dog interaction; emotional state; heart rate; heart rate variability;  
52 environmental enrichment

53

## 54 **1. Introduction**

55 Dogs benefit from an environment enriched with toys or feeding enrichment [1-3] as well as from  
56 interactions with humans [4-7]. So-called interactive games or toys are designed for the joint  
57 application of dog and human and therefore combine the benefits of human interaction, food and  
58 cognitive enrichment [e.g. 2, 5, 8]. The basic idea behind interactive games is to solve a task and  
59 thereby gain access to a treat under the close supervision of a human. To get dogs accustomed to the  
60 game, the level of difficulty is gradually raised and it is recommended that dog owners provide  
61 assistance and encouragement to increase the level of involvement by the dog [e.g. 9].

62 Social learning is learning through observation of others, whether it be humans or other dogs [10,  
63 11]. Various studies have shown that demonstrations by humans improve a dog's performance  
64 especially in moving and manipulating objects [e.g. 12, 13, 14]. Therefore, adding human  
65 demonstration to the introduction of an interactive game should allow a dog to solve the tasks  
66 quicker and increase the benefit of interactive game use as success in a task has been shown to be a  
67 catalyst for positive emotion [15]. In contrast, a hasty introduction without human demonstration  
68 might lead to frustration and distress [15, 16].

69 Measuring stress and assessing welfare, particularly the valence of emotional states in animals, is  
70 challenging. Most approaches rely on multiple parameters integrating behavior and physiology. The  
71 measurement of heart rate (HR) and heart rate variability (HRV) is an important non-invasive tool to  
72 assess the autonomic impact of different types of stimuli in animals [17]. HRV is the variation in time  
73 intervals between consecutive heartbeats and can be quantified by analyzing R-R or inter-beat  
74 intervals. Since it is influenced by sympathetic and parasympathetic neural activity, HRV provides an  
75 insight into the activity of the autonomic nervous system [18, 19] and has been used to assess  
76 emotional state of dogs confronted with different types of stimuli [20-22]. Increases in HR can be  
77 regarded as a measure of arousal, with either positive or negative emotional valence [23] and HR is a  
78 product of influences from both branches of the autonomic nervous system [24]. Increases in HRV,  
79 particularly the high frequency component and respiratory sinus arrhythmia, can be regarded as a  
80 measure of parasympathetic activity [19, 25]. Two commonly used HRV parameters are the time-  
81 domain measures SDNN (standard deviation of the R-R, or N-N, intervals), which is influenced by  
82 sympathetic and parasympathetic activity, and RMSSD (root mean square of successive differences)

83 which estimates short-term components of high-frequency beat-to-beat variation and therefore  
84 reflects parasympathetic activity [17]. In dogs, pharmacological and surgical blockade showed that  
85 both the SDNN and an estimate of the high frequency component of the R-R interval variability  
86 ('vagal tone index') seem to be largely controlled by parasympathetic influences [24].

87 The aim of this study was to compare two different styles of introduction to an interactive game on  
88 the degree of success or reward-acquisition and the valence of emotional states experienced during  
89 game play. Whereas a gradual approach with a demonstration of opening mechanisms is  
90 recommended by manufacturers, inexperienced dog owners may use a hasty introduction lacking  
91 social demonstration. We hypothesize that dogs given a gradual introduction will be more successful  
92 in reaching the treats and will show fewer signs of stress-related behavior and lower arousal (as  
93 measured by HR).

94

## 95 **2. Animals, Materials & Methods**

96 In this study, shelter dogs were tested in two conditions (stepwise (s), complete (c)) in a  
97 counterbalanced order, mimicking a gradual (order s/c) and a hasty introduction (order c/s), with the  
98 objective to compare dog behavior, heart rate (HR) and heart rate variability (HRV). The interactive  
99 game "Poker Box 1 ©Trixie" containing four boxes with different opening mechanisms from the  
100 company TRIXIE Heimtierbedarf GmbH & Co. KG was used (Figure 1a). The stepwise condition  
101 represented a slow introduction into the game including a repetition of movements while filling the  
102 game to demonstrate the opening mechanisms of the boxes. The complete condition represented  
103 the opposite, a rather hasty approach, which did not involve any help through additional  
104 demonstration of opening mechanisms of the boxes. The study was discussed and approved by the  
105 institutional ethics and animal welfare committee in accordance with GSP guidelines and national  
106 legislation.

### 107 **2.1. Animals**

108 28 dogs (17 females, 11 males; mean age  $\pm$  SD: 4.5  $\pm$  3.2 years) were tested in both conditions in a  
109 counterbalanced order. Twenty dogs were mixed breeds and eight were of a recognized breed (1  
110 Rottweiler, 1 Pit Bull Terrier, 1 American Staffordshire Terrier, 1 Jack Russel Terrier, 1 Akita Inu, 1  
111 American Bulldog, 2 American Staffordshire Terrier). For the duration of the study all dogs were  
112 housed in a local animal shelter and handled by the two experimenters (BA & SL) and their usual  
113 caretakers.

114

115 2.2. Experimental procedure

116 Each condition included three consecutive sessions of ‘playing’ an interactive game of a maximum  
 117 duration of ten minutes with two breaks of five minutes between sessions (Figure 1b). Session 1 and  
 118 session 2 of the stepwise condition differed from session 1 and session 2 of the complete condition.  
 119 The setup of session 3 was identical in both conditions. The dogs were randomly assigned to one of  
 120 two orders of conditions (stepwise/complete (s/c), complete/stepwise (c/s)). Dogs within order s/c  
 121 (15 dogs) started with the stepwise condition (mimicking a gradual introduction as recommended by  
 122 the manufacturer) while dogs within order c/s (13 dogs) started with the complete condition  
 123 (simulating a hasty approach by the owner). The two conditions were carried out on two separate  
 124 days with usually one resting day between conditions (Figure 1b).

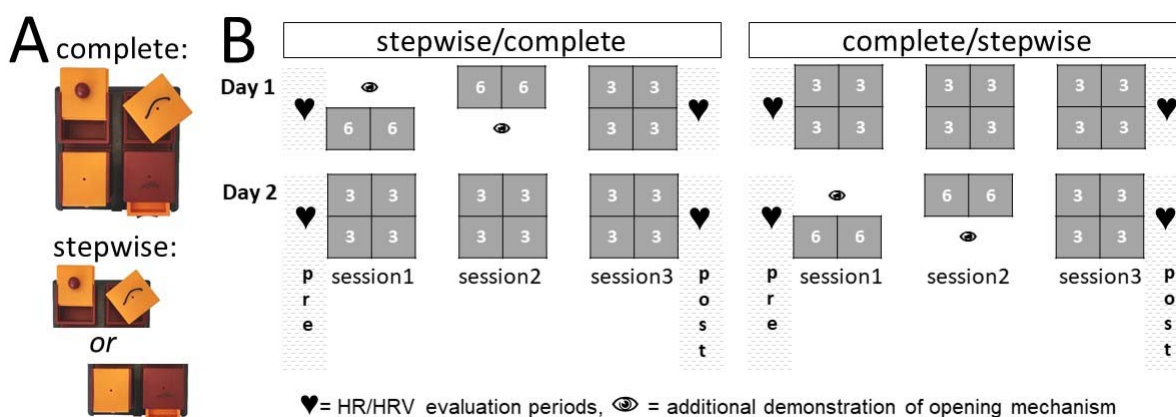

125

126 Figure 1: Interactive game used in the study (A) and layout of the experimental procedure (B)

127 In the stepwise condition, in the first session the dog was introduced to only two out of the four  
 128 different boxes of the interactive game (Figure 1a – stepwise). Six trials with each box filled with one  
 129 treat per trial were conducted (Figure 1b). In total, 12 treats could be obtained. While filling the  
 130 boxes, the experimenter (SL) first called the dog’s name and showed the treat to the dog. In addition  
 131 during the stepwise condition, the experimenter demonstrated the opening and closing of the boxes  
 132 twice. After a five-minute break the next session started. In session 2 the setup was identical to  
 133 session 1 but the other two, still unknown boxes were presented to the dog. The two boxes were  
 134 always presented simultaneously. In the third session all four boxes were used simultaneously  
 135 without an additional demonstration of opening mechanisms. Three trials with one treat per box  
 136 were carried out (12 treats could be obtained). In the complete condition all sessions (1, 2 and 3) had  
 137 the same setup as the third session in the stepwise condition. While the boxes were filled, the dog,  
 138 accompanied by the handler (BA), watched from the waiting area (a blanket) opposite from the game  
 139 until the experimenter gave the start signal.

140 The experiment was carried out in a wooden detached house surrounded by a fenced garden located  
141 on the grounds of the animal shelter. The testing room was equipped with a blanket that served as  
142 the waiting area for dog and handler during the sessions, a water bowl, an additional soft resting  
143 place for the dog and a couch. The interactive game was presented opposite to the waiting area on a  
144 non-slip mat. During the entire experiment, video recordings of dog behavior were conducted (four  
145 digital cameras placed in the corners of the room: GV-BX 1300; software: GEO Vision Digital  
146 Surveillance System 8.5.9.09). Inter-beat intervals (IBIs) were recorded using a Polar® heart rate  
147 monitor (RS800CX, Polar® Electro Oy) previously validated for use in dogs [26, 27].

148 On testing days, the caretaker and the dog met with the experimenters for a short walk. After the  
149 walk and the fitting of the Polar® heart rate monitor the caretaker left the dog with the  
150 experimenters. The transmitter of the Polar® heart rate monitor was placed ventrally on the chest  
151 area with the electrodes extending laterally to each side [26]. The dog was allowed 10 minutes to  
152 habituate to the new environment. Two six-minute HR/HRV evaluation periods per testing day, one  
153 after habituation before the start of the first session (pre day 1/pre day 2) and one after the third  
154 session (post day 1/post day 2), were scheduled. During these periods, the dogs were kept on a short  
155 leash in a standing position.

## 156 2.3. Data handling

### 157 2.3.1. BEHAVIOR

158 The software Solomon Coder (Copyright © 2016 by András Péter) was used for a detailed analysis of  
159 behavioral elements of dogs during the test sessions. Continuous sampling was used to record  
160 frequencies and durations of dog behavior. Coding was carried out by one trained observer (handler,  
161 BA). For a description of all coded behaviors see the ethogram (Table 1). The duration of a session  
162 depended on how quickly the dog succeeded to open the boxes. A session started with the *start*  
163 *signal* (the start signal in both conditions was nodding combined with saying ‘Such!’, the German  
164 word for ‘search’) of the experimenter and ended when the dog had accomplished all tasks of each  
165 trial or the *stop signal* was given by the experimenter. Each achieved treat was coded as ‘success’.  
166 The stop signal was given when the dog stopped interacting with the game and did not resume  
167 playing after a previously determined method of encouraging: in the stepwise condition the  
168 experimenter pointed at the game saying the word ‘Such!’ repeating this a maximum of six times  
169 every ten seconds. The procedure was the same in the complete condition but without pointing at  
170 the game. For further analyses of behavior, we calculated a rate per minute for frequencies and a  
171 percentage of time for durations.

172 To determine intra- and interrater-reliability, different sessions of twelve dogs were coded twice.  
173 Videos were chosen randomly from the whole period of data acquisition. The intra- and inter-rater-

174 reliability for all behavioral variables was determined by using the Spearman rank correlation  
 175 coefficient. Intra-rater reliability was high (mean over all coded behaviors:  $r_s = 0.99$ ,  $p < 0.01$ ;  
 176 minimum over all coded behaviors:  $r_s = 0.91$ ,  $p < 0.01$ ). Also the inter-rater reliability resulted in  
 177 excellent agreement (mean:  $r_s = 0.99$ ,  $p < 0.01$ ; minimum:  $r_s = 0.85$ ,  $p < 0.01$ ).

178 **Table 1:** Ethogram: Behavioural elements recorded during the interactive game sessions. Durations (dur) or  
 179 frequencies (fr) were recorded.

| Behavioural elements             | Description                                                                                                                          |
|----------------------------------|--------------------------------------------------------------------------------------------------------------------------------------|
| <b>Interaction with the game</b> |                                                                                                                                      |
| Mouth (dur)                      | Dog is manipulating the game with the mouth and/or teeth                                                                             |
| Paw (dur)                        | Dog is manipulating the game with front legs                                                                                         |
| Mouth & Paw (dur)                | Dog is manipulating the game with the mouth/teeth and front legs simultaneously                                                      |
| <b>Contact with human</b>        |                                                                                                                                      |
| Look at experimenter (dur)       | Dog is looking at the experimenter                                                                                                   |
| Look at handler (dur)            | Dog is looking at the handler                                                                                                        |
| Body contact experimenter (dur)  | Dog is sitting, lying or moving with body contact to the experimenter                                                                |
| Body contact handler (dur)       | Dog is sitting, lying or moving with body contact to the handler                                                                     |
| <b>Behaviour during play</b>     |                                                                                                                                      |
| Look away, call (dur)            | Dog is averting sight or turning head away when called by the experimenter                                                           |
| Scratching (dur)                 | Scratching the own body with one of the two hind legs                                                                                |
| Lip lick (fr)                    | Part of tongue is shown, short movements along the upper lips                                                                        |
| Shaking (fr)                     | Rotation movement of the whole body                                                                                                  |
| Stretching (fr)                  | Different body parts (front legs, hind legs, back and neck) in stretched posture                                                     |
| Play bow (fr)                    | The front part of the dog's body is lowered - lying on the front legs and the posterior is heightened - dog is standing on hind legs |
| Yawning (fr)                     | Mouth opened widely, the tongue is rolled up, sometimes accompanied by a high, soft noise                                            |
| Barking (dur)                    | Short, low frequency noises                                                                                                          |
| Whimpering (dur)                 | Soft, high pitched vocalisation                                                                                                      |
| Tail wagging (dur)               | Repetitive movements of the tail                                                                                                     |
| Panting (dur)                    | Mouth is opened, increased frequency of in- and exhaling, often with a hearable breathing noise                                      |
| <b>Location</b>                  |                                                                                                                                      |
| Around mat (dur)                 | Dog is standing, walking or sitting on the rubber mat, were the game is placed upon                                                  |
| At door (dur)                    | Dog is sitting or standing close to the door of the testing room                                                                     |

180

181

### 182 2.3.2. HR AND HRV

183 Polar® Precision Performance was used for a preliminary assessment of the measurement periods'  
184 error rates. First a rough estimation over the entire six-minute evaluation period was done. Two dogs  
185 with extremely high error rates (> 30 %, Polar® filter power “very low”) were excluded from further  
186 analyses at this point (c/s = 2 dogs). In the next step, error rates were determined separately for  
187 every minute and three consecutive minutes were chosen for manual error correction. If possible,  
188 the first three minutes were used. Only if other minutes with considerably lower error rates were  
189 available, these were selected. During the evaluation of error rates per minute, three dogs had to be  
190 excluded from further analyses as it was not possible to find three consecutive minutes with  
191 acceptable error rates (s/c = 1, c/s = 2). In the third step, the time interval and IBI data of the selected  
192 minutes were exported to an Excel file and errors were identified visually or based on differences  
193 between consecutive IBIs and then corrected manually based on a commonly used approach  
194 (Marchant-Forde et al. 2004, Gamelin et al. 2008, Jonckheer-Sheehy et al. 2012, Schöberl et al. 2014,  
195 Giles et al. 2016, Lensen et al. 2017). Details on error correction are provided in the supplementary  
196 material. Errors in data of 23 dogs were corrected manually and only three-minute recordings with  
197 less than 10 % errors were included in the statistical analyses. Further three dogs had to be excluded  
198 (s/c = 2, c/s = 1) and further three dogs did not fulfill this criterion for all evaluation periods (s/c = 2,  
199 c/s = 1). The final sample for HR/HRV analyses with data in all evaluation periods consisted of 17 dogs  
200 (s/c = 10, c/s = 7); data for post day1/post day 2 was available in 20 dogs (s/c = 12, c/s = 8). The  
201 corrected three-minute recordings of IBI data were imported in the software Kubios HRV Standard  
202 Version 3.0.2 (Kubios Oy). The following time domain parameters (mean HR, RMSSD, SDNN,  
203 RMSSD/SDNN ratio) were used for statistical analyses.

### 204 2.4. Statistical analyses

205 Descriptive and inferential statistical analyses were carried out with the statistical package SPSS  
206 Statistics Version 22.0 and 25.0 (IBM Corp 2013) except for linear mixed effects analyses (LMM)  
207 which was performed using the statistical software R (R Core Team 2018) and “lme” function from  
208 the package “nlme” [28].

209 In order to group dog behaviors during play with the strategy game, principal component analyses  
210 (PCA) followed by Varimax rotation were carried out. Bartlett’s test of sphericity was required to be  
211 significant and the Kaiser-Meyer-Olkin criterion should be at least 0.5. Components were required to  
212 have an eigenvalue greater than one. To include behaviors in the final solution, the Anti-Image  
213 Correlation Matrix diagonal was required to be at least 0.5 and behaviors with double loadings larger  
214 than 0.4 were excluded from further analyses. Initially, all dog behaviors during game use including  
215 contact with humans were analyzed in one PCA. However, interactions with humans resulted in



216 several double loadings higher than 0.4. Therefore, interactions with humans were analyzed  
217 separately. Only one variable (barking) did not fulfil our conditions and was excluded from the final  
218 solution. Factor scores were calculated by using the Regression scores method of SPSS. The PCA of  
219 dog behavior during game use resulted in a four components solution explaining 62.3% of the total  
220 variance (see table 2 for factor loadings; % variance explained by factor score fiddle: 20.2; arousal:  
221 17.5; avoidance: 13.4; displacement: 11.1). The second PCA regarding contact with humans resulted  
222 in a one component solution explaining 52.6% of the total variance (see table 2 for factor loadings).

223 To check whether LMM fulfilled the model assumptions, residual plots of all linear mixed effects  
224 models were obtained and inspected graphically for normality and homogeneity of variances. When  
225 outliers were identified (> 3 SD), the analyses were repeated without them and if there were no  
226 obvious differences in the results, the models based on the complete dataset are presented (which  
227 was the case for all models). If model assumptions were not fulfilled (e.g. variance inhomogeneity)  
228 the dependent variable was transformed using a log or rank transformation. This was necessary for  
229 some behavior factor scores. The transformation which led to the model that fulfilled the assumption  
230 of variance homogeneity best was chosen ('fiddle': log; 'avoidance': rank; 'displacement': log).

231 Regarding behavior all linear mixed models were calculated with order (s/c, c/s) and condition  
232 (stepwise, complete) as fixed factors and order\*condition as two-way interaction. As random effect  
233 the identity of dogs was included. As several models were calculated ('success', five behavior factor  
234 scores) a correction for multiple testing using the Bonferroni method was done in the cluster of 5  
235 tests including all behavior factor scores: the p - value considered to be significant was  $p < 0.01$ .

236 To analyze HR and HRV, the differences (deltas  $\Delta$ ) between pre- and post-test evaluation periods  
237 were calculated. The deltas were obtained by subtracting pre from post-periods (post – pre on day 1  
238 and day 2). Therefore a positive delta indicates an increase and a negative delta indicates a decrease  
239 in values after the third session. The LMM included the same fixed effects and random effect as the  
240 models for behavior.

241 In addition, HR and HRV parameters were analyzed with Pearson correlations for each  
242 order\*condition combination separately. To detect possible differences between dogs in the order  
243 s/c or c/s at the start of testing, pre values were compared between dogs on day 1 and day 2 by using  
244 t-tests.

245

246

247 Table 2: Factor loadings and Spearman Correlations between success during play with an interactive  
 248 game and dog behavior based on data from 28 dogs tested in six sessions over two conditions (in  
 249 total: 168 sessions).

|                                    | Factor loading | Success/<br>minute<br>$r_s$ | p       |
|------------------------------------|----------------|-----------------------------|---------|
| <b>Interactions with game</b>      |                |                             |         |
| % mouth                            | --             | 0.88                        | < 0.001 |
| % paw                              | --             | 0.46                        | < 0.001 |
| % mouth & paw                      | --             | 0.61                        | < 0.001 |
| % time interacting with game       | --             | 0.91                        | < 0.001 |
| % around mat                       | --             | 0.74                        | < 0.001 |
| % at door                          | --             | -0.42                       | < 0.001 |
| <b>Dog behaviour</b>               |                |                             |         |
| <i>Factor score fiddle</i>         |                | 0.26                        | 0.001   |
| Stretch/min                        | <b>0.935</b>   | -0.10                       | 0.204   |
| Playbow/min                        | <b>0.932</b>   | -0.11                       | 0.176   |
| <i>Factor score arousal</i>        |                | -0.49                       | < 0.001 |
| % whimpering                       | <b>0.804</b>   | -0.27                       | < 0.001 |
| Liplick/min                        | <b>0.717</b>   | -0.61                       | < 0.001 |
| % tail wagging                     | <b>0.597</b>   | -0.34                       | < 0.001 |
| <i>Factor score avoidance</i>      |                | -0.58                       | < 0.001 |
| % lookaway when called             | <b>0.761</b>   | -0.48                       | < 0.001 |
| Yawning/min                        | <b>0.691</b>   | -0.27                       | < 0.001 |
| % panting                          | <b>0.581</b>   | -0.44                       | < 0.001 |
| <i>Factor score displacement</i>   |                | -0.34                       | < 0.001 |
| Shaking/min                        | <b>0.808</b>   | -0.32                       | < 0.001 |
| % scratching                       | <b>0.764</b>   | -0.15                       | 0.054   |
| Not included in final solution:    |                |                             |         |
| % barking                          |                | -0.22                       | 0.004   |
| <b>Behaviour towards humans</b>    |                |                             |         |
| <i>Factor score contact humans</i> |                | -0.88                       | < 0.001 |
| % looking at experimenter          | <b>0.767</b>   | -0.83                       | < 0.001 |
| % looking at handler               | <b>0.854</b>   | -0.82                       | < 0.001 |
| % bodycontact to experimenter      | <b>0.641</b>   | -0.73                       | < 0.001 |
| % bodycontact to handler           | <b>0.611</b>   | -0.54                       | < 0.001 |

250

### 251 3. Results:

#### 252 3.1. Descriptive statistics of duration of use and interaction with the game

253 Overall, a session including time waiting for the game to be filled with treats and time 'playing' with  
 254 the game had a mean duration of  $4.4 \pm 1.9$  min (Minimum: 1.4 min; Maximum: 9.5 min). For dogs in  
 255 the recommended order s/c the time manipulating the game in the stepwise condition on the first  
 256 day was on average  $2.6 \pm 1.2$  min per session and in the complete condition on the second day  $1.9 \pm$   
 257  $0.9$  min per session. Dogs in the order c/s engaged shorter with the interactive game (complete:  $1.0 \pm$   
 258  $1.0$  min, stepwise:  $1.7 \pm 1.1$  min per session). Overall, dogs manipulated the game mainly with the  
 259 mouth. The proportion of time staying around the mat differed slightly between the two orders and  
 260 dogs in order c/s stayed around the mat less and stood at the exit door of the experimental room  
 261 longer in the complete condition (see Table 3). The dogs in order s/c reached on average  $10 \pm 4$   
 262 treats per session on the first day and  $11 \pm 4$  treats per session on the second day (in session 3 all  
 263 dogs obtained 12 treats except one that did not perform at all). Dogs in order c/s were less successful

264 and gained on average  $2 \pm 3$  treats per session on the first day and  $8 \pm 5$  treats per session on the  
 265 second day. Sessions were interrupted more frequently in the order c/s (day 1:  $3 \pm 1$ , day 2:  $2 \pm 2$ ;  
 266 order s/c – day 1:  $1 \pm 2$ , day 2:  $0 \pm 1$ ).

267

268 Table 3: Percentage of time spent interacting with the game by order and condition

|                              | s/c      |      |          |      | c/s      |      |          |      |
|------------------------------|----------|------|----------|------|----------|------|----------|------|
|                              | stepwise |      | complete |      | complete |      | stepwise |      |
|                              | Mean     | SD   | Mean     | SD   | Mean     | SD   | Mean     | SD   |
| % mouth                      | 51.8     | 18.6 | 66.3     | 24.9 | 23.2     | 17.1 | 47.1     | 29.8 |
| % paw                        | 6.1      | 6.5  | 8.1      | 9.6  | 0.4      | 1.2  | 3.0      | 6.7  |
| % mouth & paw                | 4.1      | 4.3  | 5.0      | 4.9  | 1.4      | 4.9  | 3.5      | 5.5  |
| % time interacting with game | 62.0     | 22.2 | 79.4     | 25.5 | 25.1     | 21.1 | 53.5     | 33.7 |
| % around mat                 | 92.2     | 9.2  | 94.5     | 9.8  | 80.6     | 14.1 | 86.7     | 18.2 |
| % at door                    | 0.6      | 1.8  | 0.6      | 2.3  | 1.8      | 3.1  | 0.4      | 1.2  |

269

270 3.2. Effect of game setup on rate of success

271 The linear mixed model analyses resulted in significant main effects for order and condition as well as  
 272 a significant interaction of order\*condition on the rate of success (Table 4). In particular, the success  
 273 rate was much higher for dogs tested within order s/c as compared to dogs tested within order c/s  
 274 on both the first and second test day (Figure 2 A).

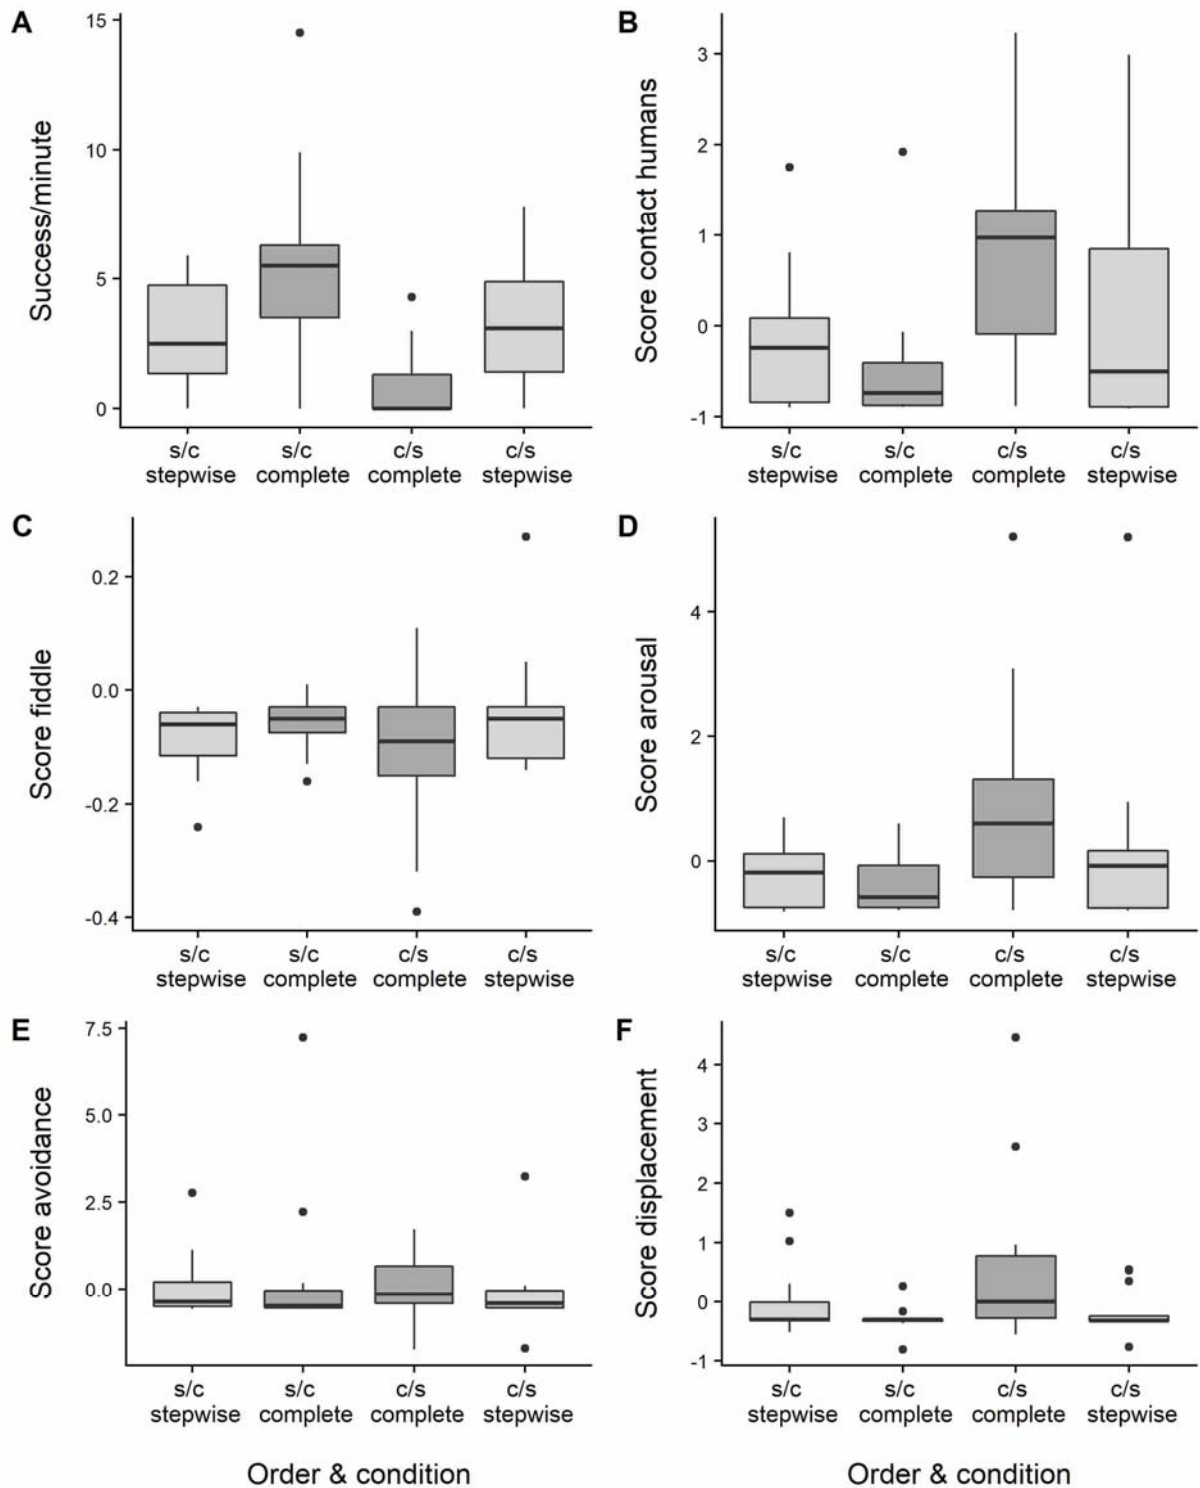

275

276 Figure 2: Boxplots of success per minute and behavior factor scores by order and condition

### 277 3.3. Effect of game setup on dog behavior

278 Significant main effects of order and condition and their two-way interaction on the factor scores of  
 279 dog behavior (arousal, displacement) and contact with humans were found (see Table 4). Factor  
 280 scores for arousal, displacement and contact with humans show a similar pattern (Figure 2B, D, F).

281 Especially on day 1, dogs tested within order c/s displayed more behaviors indicative of high arousal,

282 made contact more often with humans and displayed more displacement behaviors in contrast to  
 283 dogs tested within the order s/c. These behaviors were generally observed more often on day one  
 284 than on day two, but dogs tested in the order s/c displayed overall lower levels. For the factor score  
 285 ‘fiddle’ only the main effect of condition and the interaction order \* condition remained significant  
 286 after correction for multiple testing (Table 4). The pattern observed contrasts the results regarding  
 287 arousal, displacement and contact with humans (Figure 2 C). Behaviors included in the fiddle factor  
 288 score were observed more often on day two of testing and the change in behavior was more  
 289 pronounced in dogs within order c/s. No significant effects on the avoidance factor score were found  
 290 (Table 4, Figure 2E).

291 Table 4: Results of LMM for effect of game set up on success rate and behavior factor scores. P-  
 292 values remaining significant after multiple testing are in bold print.

|           | Success per minute |                | Fiddle <sup>a</sup> |                | Arousal          |                | Avoidance <sup>b</sup> |       | Displacement behaviour <sup>a</sup> |                | Contact with humans |                |
|-----------|--------------------|----------------|---------------------|----------------|------------------|----------------|------------------------|-------|-------------------------------------|----------------|---------------------|----------------|
|           | Chi <sup>2</sup>   | p              | Chi <sup>2</sup>    | p              | Chi <sup>2</sup> | p              | Chi <sup>2</sup>       | p     | Chi <sup>2</sup>                    | p              | Chi <sup>2</sup>    | p              |
| Order     | 15.915             | < <b>0.001</b> | 3.9653              | 0.046          | 9.687            | < <b>0.001</b> | 1.405                  | 0.235 | 11.797                              | < <b>0.001</b> | 15.915              | < <b>0.001</b> |
| Condition | 16.163             | < <b>0.001</b> | 7.1992              | < <b>0.001</b> | 14.756           | < <b>0.001</b> | 2.691                  | 0.101 | 13.441                              | < <b>0.001</b> | 16.163              | < <b>0.001</b> |
| Order *   |                    |                |                     |                |                  |                |                        |       |                                     |                |                     |                |
| Condition | 14.826             | < <b>0.001</b> | 7.007               | < <b>0.001</b> | 9.756            | < <b>0.001</b> | 4.111                  | 0.043 | 15.517                              | < <b>0.001</b> | 14.826              | < <b>0.001</b> |

293 <sup>a</sup> variable was transformed using log-transformation; <sup>b</sup> variable was transformed using rank-transformation

294

### 295 3.4. Relationship of rate of success with dog behavior and use of interactive game

296 Increased success per minute was highly related to an increased proportion of time interacting with  
 297 the game as well as manipulating the game with the mouth (see Table 2). The most prominent  
 298 relationships between success and dog behavior was found for interactions with humans. The more  
 299 dogs looked at or initiated body contact to the experimenter or handler the less successful they  
 300 were. Regarding the other dog behaviors, lip-licking and avoiding interaction with the game, i.e.  
 301 looking away when being called by the experimenter to resume playing and a high arousal factor  
 302 score resulted in the highest negative relationship with success (Table 2).

### 303 3.5. Effect of game setup on HR and HRV

304 To ascertain that dogs in the two orders did not differ in absolute values of HR and HRV parameters,  
 305 we compared pre-testing values (before interactive game use) on day1 (HR: s/c = 115±9, c/s =  
 306 123±18; SDNN: s/c = 55±15, c/s = 57±20; RMSSD: s/c = 44±18, c/s = 52±26) and day 2 (HR: s/c =  
 307 118±11, c/s = 125±22; SDNN: s/c = 57±8, c/s = 60±31; RMSSD: s/c = 56±15, c/s = 57±36) and found no  
 308 significant differences between s/c dogs and c/s dogs (p > 0.3 for all tests).

309 The LMM resulted in no significant effects for any of the main effects (order (o), condition (c)) or the  
 310 two-way interaction (order\*condition (o\*c)) for the delta values of HR (o: p = 0.693, c: p = 0.549, o\*c:

311  $p = 0.755$ ;  $s/c - s$ :  $-3.63 \pm 9.38$ ,  $s/c - c$ :  $-2.92 \pm 5.80$ ,  $c/s - c$ :  $-4.36 \pm 8.97$ ,  $c/s - s$ :  $-6.57 \pm 6.83$ ),  
312 SDNN( $o$ :  $p = 0.999$ ,  $c$ :  $p = 0.869$ ,  $o*c$ :  $p = 0.575$ ;  $s/c - s$ :  $4.70 \pm 22.33$ ,  $s/c - c$ :  $-0.70 \pm 15.13$ ,  $c/s - c$ :  
313  $0.71 \pm 21.62$ ,  $c/s - s$ :  $-2.29 \pm 15.53$ ) and RMSSD ( $o$ :  $p = 0.842$ ,  $c$ :  $p = 0.579$ ,  $o*c$ :  $p = 0.253$ ;  $s/c - s$ :  
314  $12.26 \pm 28.15$ ,  $s/c - c$ :  $-0.26 \pm 24.93$ ,  $c/s - c$ :  $2.20 \pm 27.47$ ,  $c/s - s$ :  $-5.23 \pm 26.19$ ). The LMM for the  
315 delta value of the RMSSD/SDNN ration resulted in a statistical tendency for the interaction  
316 order\*condition ( $\text{Chi}^2 = 2.75$ ,  $p = 0.097$ ;  $s/c - s$ :  $0.14 \pm 0.21$ ,  $s/c - c$ :  $0.00 \pm 0.22$ ,  $c/s - c$ :  $-0.01 \pm 0.10$ ,  
317  $c/s - s$ :  $-0.08 \pm 0.19$ ); main effects were not significant ( $o$ :  $p = 0.912$ ,  $c$ :  $p = 0.423$ ). However, when  
318 correlations between HR and the two HRV parameters were analyzed separately for each evaluation  
319 period and both orders of testing, a substantially different pattern of correlation depending on the  
320 order of testing emerged (Figure 3 and 4). In the order  $c/s$ , the baseline measurement (pre day 1 ( $N =$   
321  $7$ )) showed a negative correlation between HR and RMSSD ( $r = -0.719$ ,  $p = 0.07$ ) or HR and SDNN ( $r = -$   
322  $0.719$ ,  $p = 0.07$ ). This negative correlation got stronger and statistically significant ( $p < 0.05$ ) and  
323 remained stable over the further three time-points of HR and HRV measurements (post day 1 ( $N = 8$ ):  
324 RMSSD  $r = -0.890$ , SDNN  $r = -0.879$ ; pre day 2 ( $N = 7$ ): RMSSD  $r = -0.813$ , SDNN  $r = -0.844$ ; post day2  
325 ( $N = 8$ ): RMSSD  $r = -0.831$ , SDNN  $r = -0.818$ ). In the order  $s/c$ , the correlations of the baseline  
326 measurements (pre day 1 ( $N = 10$ )) were similarly negative (HR-RMSSD  $r = -0.520$ ,  $p = 0.12$ , HR-SDNN  
327  $r = -0.601$ ,  $p = 0.07$ ). However, in the order  $s/c$ , this negative correlation got weaker over time (post  
328 day1 ( $N = 12$ ): RMSSD  $r = -0.411$ , SDNN  $r = -0.434$ ; pre day 2 ( $N = 10$ ): RMSSD  $r = 0.081$ , SDNN  $r = -$   
329  $0.152$ ), and finally turned into a statistically significant positive correlation on day 2 after playing the  
330 game (post day2 ( $N = 12$ ): RMSSD  $r = 0.784$ , SDNN  $r = 0.707$ ,  $p < 0.05$ ). This pattern in order  $s/c$  was  
331 still present (Figure 3), when only dogs with data on all time points were included and the only dog in  
332 this order that did not successfully use the interactive game was excluded ( $N = 9$ , pre day 1: RMSSD  $r = -$   
333  $-0.554$ , SDNN  $r = -0.631$ ; post day 1: RMSSD  $r = -0.513$ , SDNN  $r = -0.484$ ; pre day 2: RMSSD  $r = -$   
334  $0.170$ , SDNN  $r = -0.439$  – all  $p$ -values  $> 0.05$ ; post day2: RMSSD  $r = 0.685$ ,  $p = 0.042$ , SDNN  $r = 0.485$ ,  $p$   
335  $= 0.166$ ). The correlation between SDNN and RMSSD was always positive and above  $r = 0.9$  in both  
336 orders except for the reduced dataset in order  $s/c$  at the evaluation period post day 2, where it was  
337 slightly below ( $r = 0.884$ ,  $p = 0.002$ ,  $N = 9$ ). Scatterplots of the baseline values of HR and RMSSD (pre  
338 day 1) and the measurement after interacting with the game on the second day (post day 2) show  
339 the development of HR and RMSSD for individual dogs over time (Figure 4).

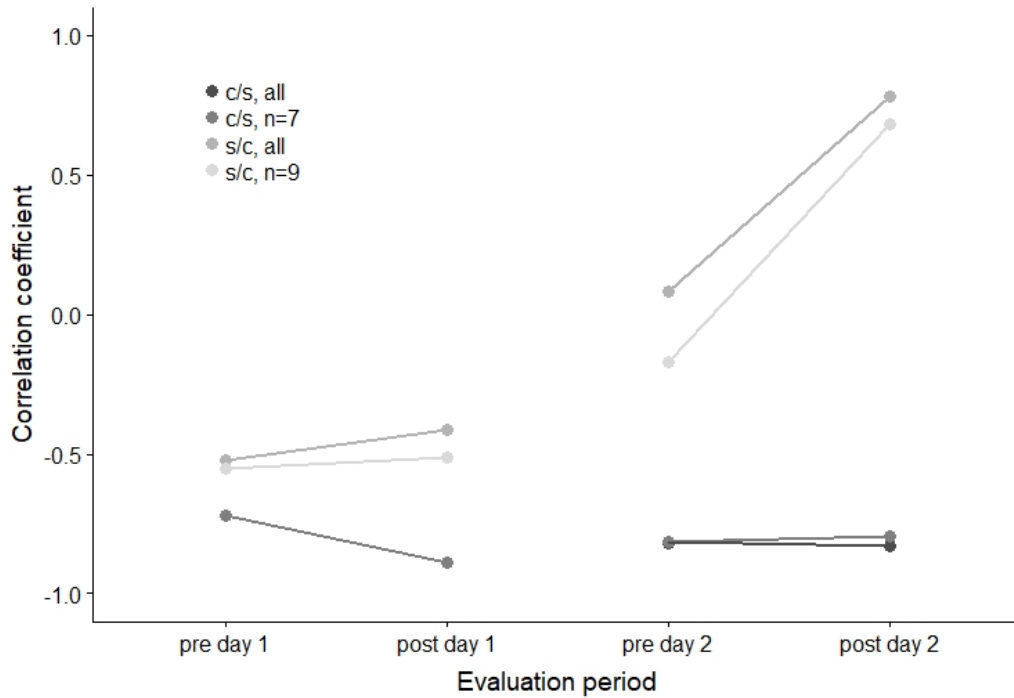

340

341 Figure 3: Development of Pearson correlation between heart rate (HR) and the heart rate variability  
342 parameter RMSSD over time by order (s/c & c/s). Due to missing values in the pre-evaluation periods,  
343 we display both the correlation coefficients based on the whole dataset (all) and the samples with  
344 complete data in all four evaluation periods.

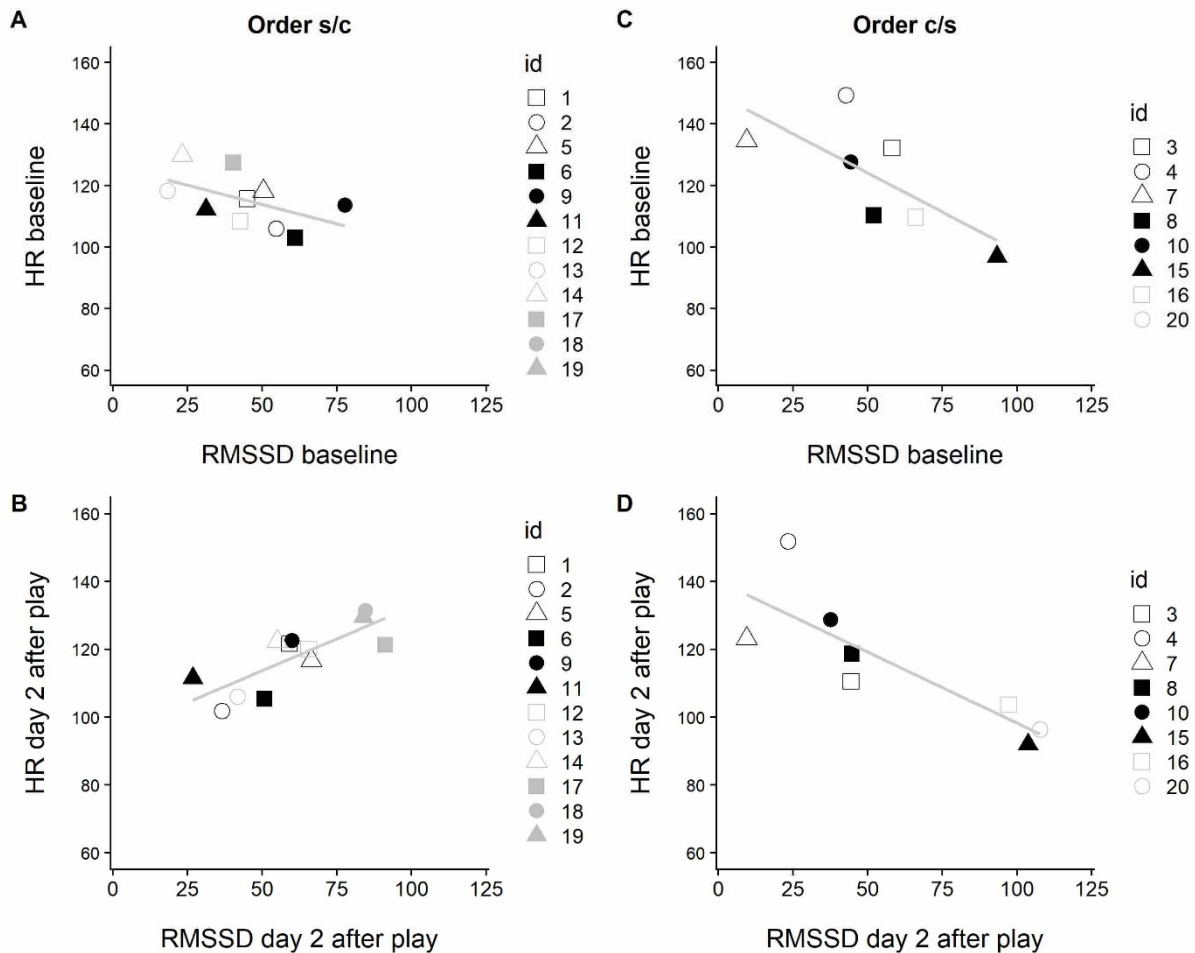

345

346 Figure 4: Scatterplots of the baseline values of HR and RMSSD (pre day 1) and after interacting with  
 347 the game on the second day (post day 2) for individual dogs per order based on the whole data set

348

#### 349 4. Discussion

350 In this study we investigated two different approaches to introduce an interactive game for dogs. A  
 351 gradual presentation of the interactive game with human demonstrations of the opening  
 352 mechanisms was compared to a hasty introduction without additional demonstrations of the  
 353 opening mechanisms. We expected that the two introductions which differed in terms of difficulty  
 354 and provision of human aid would lead to differences in success rate, occurrence of so-called stress-  
 355 related behaviors and HR/HRV parameters. Regarding success and dog behavior, our results  
 356 confirmed our hypotheses. Dogs given a gradual introduction had a significantly higher rate of  
 357 success compared to dogs given a hasty introduction. Furthermore, for example the factor score  
 358 'arousal', which included the behaviors 'whimpering', 'lip licking' and 'tail wagging', decreased over  
 359 time within both orders and followed a contrasting pattern compared to the rate of success.

360 Whimpering or whining can be observed for example during separation from the owner, e.g. during



361 kenneling [29-31] as well as during greeting of the owner [32] but also when dogs anticipate electric  
362 shocks [33]. Lip licking can frequently be observed as a response to a friendly but also a threatening  
363 approach by humans [34] or during physical contact with a human [21] but it was also found to be  
364 related to increased cortisol in hospitalized dogs [35]. Tail wagging is observed in a wide range of  
365 situations and towards positive and negative stimuli [36]. During operant learning tasks several  
366 different tail positions and movements were found to be related to success namely a high tail  
367 position, a non-wagging tail but also (short and quick) tail wagging [15, 37]. The three behaviors  
368 included in the arousal factor score are displayed in situations where the dog is aroused without  
369 necessarily indicating valence. In our case, we suggest that a low arousal factor score might indicate  
370 that the dogs were better able to focus on the task. Consequently, this led to a higher rate of success.  
371 The stepwise condition consisted of a gradual introduction to the task (only two of the four boxes at  
372 a time), including additional human demonstrations of the different opening mechanisms and use of  
373 communicative gestures such as pointing at the game. This set of differences compared to the hasty  
374 introduction clearly enhanced the dogs' performance. It has already been shown that human  
375 demonstration and use of communicative gestures increase a dog's performance in different tasks  
376 [13, 14, 38]. In our study setup, we were not able to tell which aspects contributed most to the  
377 increased performance of dogs. However, from an applied point of view, shelter dogs were more  
378 successfully engaged in this joint human-dog activity when introduced gradually to the game.

379 In particular in the early stages, interacting with shelter dogs can be challenging for staff, volunteers  
380 or researchers. In our study, both experimenters were unfamiliar to the dogs on day 1 of testing. On  
381 one hand, past studies reported that familiarity of the demonstrator did not affect success in a task  
382 [39]. On the other hand, increased attention during a problem-solving task only occurred towards  
383 familiar humans with whom the dog had a close relationship [40]. It has been shown that shelter dogs  
384 form attachment bonds with humans quickly [41] On day 2 of testing, a bond between the dogs and  
385 the handler/experimenter might have started to develop, enhancing the dog's feeling of security and  
386 thereby improving it's performance. In both orders dogs showed more behaviors indicative of high  
387 arousal or stress on day 1 with overall higher levels in the hasty approach with factor scores 'contact  
388 with humans', 'displacement' and 'arousal' following a similar pattern. Increasing experience with  
389 manipulating the game (and more success) was associated with lower levels of interactions with the  
390 humans present in both orders on the second day. When confronted with an unsolvable task dogs may  
391 give up and gaze at the human experimenter [e.g. 42, 43]. Initiating contact to humans in response to  
392 a potentially stress-inducing situation could be interpreted either as an attempt to get help from a  
393 human or represent a displacement or redirected behavior [44]. We conclude that the second testing  
394 day was less challenging for dogs in both orders but overall dogs given a gradual introduction were  
395 more successful and less aroused, stressed or frustrated. However, to clearly separate the effect of the

396 two different conditions and orders and the two testing days, complementing the study design with  
397 two more orders of the conditions (stepwise/stepwise and complete/complete) would have been  
398 necessary.

399 Behaviors contained in the factor score “fiddle” reached higher levels on the second day in both orders.  
400 This factor score contained two behaviors: the play bow and stretching. The play bow indicates  
401 intention to play [45] and possibly reflects positive emotions [46]; stretching may indicate relaxation  
402 [47] but has also been associated with restricted housing conditions and single housing [48, 49]. When  
403 compared with our other findings, “fiddle” factor scores follow the pattern of the rate of success and  
404 contrast the pattern of the factor scores “arousal”, “displacement” and “contact to humans”. This may  
405 indicate that in our study, the factor score “fiddle” represents behaviors related to an underlying  
406 emotional state of positive valence. This is supported by findings that successful problem-solving can  
407 cause positive emotions [15, 50]. In conclusion, the results of behavior analyses show that the gradual  
408 approach led to less behaviors likely to indicate negative emotions and to more behaviors likely to  
409 indicate positive emotions in this context.

410

411 We expected dogs’ physiology to reflect, whether as a cause or a consequence, differences in  
412 behavior elicited by the way in which the interactive game was presented. Our initial hypothesis was  
413 that dogs would exhibit greater HR and lower HRV when given a hasty introduction, consistent with  
414 the notion that heightened stress from the frustration of unsuccessful usage of the game would lead  
415 to heightened arousal. While this notion was supported by behavioral observations (behavioral  
416 arousal was negatively correlated with success rate), neither condition nor order produced significant  
417 differences in the change of HR, SDNN, or RMSSD from before to after play, suggesting dogs  
418 experienced equivalent levels of physiological arousal regardless of how the interactive game was  
419 presented. This mismatch between behavioral and physiological arousal may be due to  
420 underestimating the physiological arousal that can be associated with successful play attempts.  
421 According to the two-dimensional model of core affect [51, 52], arousal and valence are orthogonal  
422 dimensions. Therefore, the order of interactive game presentation, even if it produced divergent  
423 experiences of stress or enjoyment, could both be equivalently arousing. Further, while behavior was  
424 observed directly during interacting with the game, the physiological data were taken somewhat  
425 later. Potential differences may have declined already. This finding also highlights the need to take  
426 caution when drawing conclusions on arousal based solely on physiological measurements. While  
427 order of presentation did not influence physiological arousal as measured by change in heart rate  
428 and heart rate variability, our findings on success rate and stress-related behavior suggested that  
429 order played a major role in determining the valence of the experience (i.e. whether stressful or

430 enjoyable). In addition, our behavioral findings are supported by LMM resulting in a statistical  
431 tendency for the interaction between the order of testing and the condition of game play regarding  
432 change of RMSSD/SDNN ratio. The lack of findings regarding the effect of the game setup on delta  
433 values of the two single HRV parameters RMSSD and SDNN could on the one hand indicate that  
434 effects were too small to be shown with this low sample size (sample size was reduced from 28 to 17  
435 because of high errors in R-R measurements), on the other hand looking at the change of single  
436 parameters might not tell the whole story [53, 54]. Thus, we performed secondary analyses and  
437 found a substantial change in the pattern of correlation between HR and the HRV. In general, HR is  
438 negatively correlated to HRV for physiological and mathematical reasons [24, 55]. As heart rate  
439 increases the interval between successive beats shrinks, resulting in less potential for variation  
440 between inter-beat intervals, and thus lower HRV. For this negative correlation between heart rate  
441 and heart variability to be overcome (and transform to a positive correlation) requires a shift in the  
442 central regulation of cardiac autonomic activity, one in which parasympathetic activity is elevated  
443 against a background of heightened HR. This change of pattern suggests a pattern of dual autonomic  
444 activation, or concurrent activity of the sympathetic and the parasympathetic branches of the  
445 autonomic nervous system [56]. The results of correlating HR and HRV demonstrate two important  
446 things. First, in all dogs there is a negative correlation between HR and HRV during baseline (i.e. pre  
447 day 1), consistent with what is known about cardiac autonomic regulation during affectively neutral  
448 or negative contexts [24, 55]. Second, during the last measurement after game use on day 2, several  
449 dogs that were first presented with the game in a stepwise fashion with human assistance  
450 experienced both moderate to high HR with increased HRV, in particular increased RMSSD, while  
451 dogs that were first presented with the complete game without human assistance persisted in  
452 displaying a negative HR:HRV correlation. Moreover, as the dogs first given a stepwise introduction  
453 with human assistance progressed through the experiment, we observed a gradual shift in HR:HRV  
454 correlation, from negative to positive. Our finding bears similarity to a study on cognitive enrichment  
455 in pigs, which initially led to increases in HR but not RMSSD. After two weeks pigs had to press a  
456 button five times instead of once to receive the food reward and the increase in skill and effort was  
457 associated with increases in RMSSD [57]. We suggest that concurrent activation of the sympathetic  
458 and parasympathetic branches of the autonomic nervous system might be a physiological signature  
459 of successful achievement in animals.

460 In humans, a pleasant state of absorption during a challenging activity, with an optimal and  
461 escalating balance between the skills of the person and the demands of the activity, is described as  
462 “flow” [58, 59]. Based on the results regarding success in obtaining treats (all 12 treats were obtained  
463 in session 3 on day 2 in the s/c group), our gradual introduction may have achieved a good balance  
464 between the dogs’ skill and the demands of the task. Studies investigating the flow-experience in

465 humans during a stressful event found the highest self-reported flow values with moderate  
466 activation of the sympathetic branch (low frequency HRV) and moderate to high activation of the  
467 parasympathetic branch (high frequency HRV) [60, 61]. The relationship between activation of the  
468 sympathetic nervous system and the flow-experience was described as an inverted u-shape, i.e. very  
469 low and very high activation of the sympathetic branch reduced the “flow-experience” [60]. We  
470 hypothesize that our stepwise introduction balanced skills of the dogs against the demands of the  
471 task, and may have induced a ‘flow-like state’ in some dogs. While generalization of human  
472 constructs like flow to non-human animals must be handled with extreme caution, iterative  
473 escalation between skill and challenge to achieve success on a task is likely to be a basic  
474 phenomenon not limited to humans. To the extent that they are capable of achieving mastery at a  
475 task that aids their survival, the study of flow-like states in non-human animals promises to offer  
476 novel insights into how to provide animals with more optimal experiences and improved welfare.

477 Overall, we suggest that using interactive dog games in a way so that the demands of the task are  
478 balanced against the skills of the dog, neither resulting in boredom nor excessive demands but  
479 representing ‘an optimal challenge’, has the potential to induce a pleasant ‘flow-like’ emotional state  
480 in animals. Further studies are needed to verify whether ‘flow-like’ states exist in animals.

## 481 **5. Conclusion**

482 A gradual introduction to an interactive game combined with a demonstration of the possible  
483 mechanisms to solve the tasks led to a higher rate of success and a decreased occurrence of stress-  
484 related behaviors during play in a new environment with unfamiliar humans. Although, neither  
485 condition nor order did have influences on shelter dogs’ heart rate and heart rate variability change  
486 from before to after using the interactive game, the patterns of correlation of HR and HRV in the  
487 group with a gradual introduction to the game further suggest that some dogs experienced a  
488 pleasant emotional state during/after the use of the game. The stepwise approach not only  
489 facilitated success and limited behavioral signs of arousal, stress or frustration but very likely induced  
490 positive emotions possibly similar to the flow-experience in humans. Therefore to maximize the  
491 benefits, it is of high importance to find a balance between the skills of the animal and the demands  
492 of the task when using interactive dog games. The use of this type of game is an opportunity to  
493 combine benefits of human-dog interaction, feeding and cognitive enrichment.

494

495 Acknowledgements: First, we thank the staff of the animal shelter for supporting the study and  
496 TRIXIE Heimtierbedarf GmbH & Co. KG for providing the interactive game used in the study.  
497 Furthermore, we would like to thank Andreas Futschik who provided statistical support, Christian

498 Haberl for his technical support, Jean-Loup Rault for his support in error correction of RR data and  
499 Zsófia Virányi for commenting the manuscript with regard to aspects of cognition.

500 Funding: This research was provided with two interactive games by the company 'TRIXIE  
501 Heimtierbedarf GmbH & Co. KG' but did not receive any specific grant from funding agencies in the  
502 public, commercial, or not-for-profit sectors.

503 Declarations of interest: Claudia Schmied-Wagner carried out the assessment and awarded the  
504 interactive game used in the study with the 'Animal Welfare Label'  
505 (<https://www.tierschutzkonform.at/gepruefte-produkte/2017-10-002/>). Christine Arhant and  
506 Bernadette Altrichter were involved in the practical assessment of the interactive game during this  
507 process (for further information see <http://www.tierschutzkonform.at/information-in-english/>). The  
508 assessment by the Specialist Unit for Animal Husbandry and Animal Welfare was completed in  
509 February 2017 before the start of this study in July 2017. The company TRIXIE Heimtierbedarf GmbH  
510 & Co. KG provided us with two interactive games to be used in the study but was otherwise not  
511 involved in any stage of the present study.

## 512 References

- 513 [1] Wells, D. L. The influence of toys on the behaviour and welfare of kennelled dogs. *Anim. Welfare.*  
514 2004,13:367-73.
- 515 [2] Schipper, L. L., Vinke, C. M., Schilder, M. B. H., Spruijt, B. M. The effect of feeding enrichment toys  
516 on the behaviour of kennelled dogs (*Canis familiaris*). *Appl. Anim. Behav. Sci.* 2008,114:182-95.
- 517 [3] Pullen, A. J., Merrill, R. J. N., Bradshaw, J. W. S. Preferences for toy types and presentations in  
518 kennel housed dogs. *Appl. Anim. Behav. Sci.* 2010,125:151-6.
- 519 [4] Coppola, C. L., Grandin, T., Enns, R. M. Human interaction and cortisol: Can human contact reduce  
520 stress for shelter dogs? *Physiol. Behav.* 2006,87:537-41.
- 521 [5] McGowan, R. T., Bolte, C., Barnett, H. R., Perez-Camargo, G., Martin, F. Can you spare 15 min? The  
522 measurable positive impact of a 15-min petting session on shelter dog well-being. *Appl. Anim. Behav.*  
523 *Sci.* 2018,203:42-54.
- 524 [6] Shiverdecker, M. D., Schiml, P. A., Hennessy, M. B. Human interaction moderates plasma cortisol  
525 and behavioral responses of dogs to shelter housing. *Physiol. Behav.* 2013,109:75-9.
- 526 [7] Willen, R. M., Mutwill, A., MacDonald, L. J., Schiml, P. A., Hennessy, M. B. Factors determining the  
527 effects of human interaction on the cortisol levels of shelter dogs. *Appl. Anim. Behav. Sci.*  
528 2017,186:41-8.
- 529 [8] Meehan, C. L., Mench, J. A. The challenge of challenge: can problem solving opportunities  
530 enhance animal welfare? *Appl. Anim. Behav. Sci.* 2007,102:246-61.
- 531 [9] TrixieHeimtierbedarfGmbH. 2019.
- 532 [10] Range, F., Virányi, Z. Social learning from humans or conspecifics: Differences and similarities  
533 between wolves and dogs. *Front. Psychol.* 2013,4.
- 534 [11] Huber, L., Range, F., Virányi, Z. Dog imitation and its possible origins. *Domestic Dog Cognition*  
535 *and Behavior: Springer; 2014. p. 79-100.*
- 536 [12] Fugazza, C., Moesta, A., Pogány, Á., Miklósi, Á. Social learning from conspecifics and humans in  
537 dog puppies. *Sci. Rep.* 2018,8:9257.
- 538 [13] Kubinyi, E., Topál, J., Miklósi, A., Csányi, V. Dogs (*Canis familiaris*) learn their owners via  
539 observation in a manipulation task. *J. Comp. Psychol.* 2003,117:156.

- 540 [14] Pongrácz, P., Miklósi, Á., Timár-Geng, K., Csányi, V. Verbal attention getting as a key factor in  
541 social learning between dog (*Canis familiaris*) and human. *J. Comp. Psychol.* 2004,118:375.
- 542 [15] McGowan, R. T. S., Rehn, T., Norling, Y., Keeling, L. J. Positive affect and learning: Exploring the  
543 "Eureka Effect" in dogs. *Animal Cognition.* 2014,17:577-87.
- 544 [16] Jakovcevic, A., Elgier, A. M., Mustaca, A. E., Bentosela, M. Frustration behaviors in domestic  
545 dogs. *J. Appl. Anim. Welf. Sci.* 2013,16:19-34.
- 546 [17] von Borell, E., Langbein, J., Despres, G., Hansen, S., Leterrier, C., Marchant-Forde, J., et al. Heart  
547 rate variability as a measure of autonomic regulation of cardiac activity for assessing stress and  
548 welfare in farm animals - A review. *Physiol. Behav.* 2007,92:293-316.
- 549 [18] Bilchick, K. C., Berger, R. D. Heart rate variability. *J. Cardiovasc. Electrophysiol.* 2006,17:691-4.
- 550 [19] Malik, M., Bigger, J. T., Camm, A. J., Kleiger, R. E., Malliani, A., Moss, A. J., et al. Heart rate  
551 variability: Standards of measurement, physiological interpretation, and clinical use. *Eur. Heart J.*  
552 1996,17:354-81.
- 553 [20] Zupan, M., Buskas, J., Altimiras, J., Keeling, L. J. Assessing positive emotional states in dogs using  
554 heart rate and heart rate variability. *Physiol. Behav.* 2016,155:102-11.
- 555 [21] Kuhne, F., Hößler, J. C., Struwe, R. Emotions in dogs being petted by a familiar or unfamiliar  
556 person: Validating behavioural indicators of emotional states using heart rate variability. *Appl. Anim.*  
557 *Behav. Sci.* 2014,161:113-20.
- 558 [22] Katayama, M., Kubo, T., Mogi, K., Ikeda, K., Nagasawa, M., Kikusui, T. Heart rate variability  
559 predicts the emotional state in dogs. *Behav. Processes.* 2016,128:108-12.
- 560 [23] Briefer, E. F., Tettamanti, F., McElligott, A. G. Emotions in goats: mapping physiological,  
561 behavioural and vocal profiles. *Anim. Behav.* 2015,99:131-43.
- 562 [24] Billman, G. The effect of heart rate on the heart rate variability response to autonomic  
563 interventions. *Front. Physiol.* 2013,4.
- 564 [25] Berntson, G. G., Thomas Bigger Jr, J., Eckberg, D. L., Grossman, P., Kaufmann, P. G., Malik, M., et  
565 al. Heart rate variability: origins, methods, and interpretive caveats. *Psychophysiology.* 1997,34:623-  
566 48.
- 567 [26] Jonckheer-Sheehy, V. S., Vinke, C. M., Ortolani, A. Validation of a Polar® human heart rate  
568 monitor for measuring heart rate and heart rate variability in adult dogs under stationary conditions.  
569 *J. Vet. Behav.* 2012,7:205-12.
- 570 [27] Essner, A., Sjöström, R., Ahlgren, E., Gustås, P., Edge-Hughes, L., Zetterberg, L., et al. Comparison  
571 of Polar® RS800CX heart rate monitor and electrocardiogram for measuring inter-beat intervals in  
572 healthy dogs. *Physiol. Behav.* 2015,138:247-53.
- 573 [28] Pinheiro, J., Bates, D., DebRoy, S., Sarkar, D., Team, R. C. nlme: Linear and nonlinear mixed  
574 effects models. R Package Version 3.1–111. Computer manual. 2013.
- 575 [29] Palestrini, C., Minero, M., Cannas, S., Rossi, E., Frank, D. Video analysis of dogs with separation-  
576 related behaviors. *Appl. Anim. Behav. Sci.* 2010,124:61-7.
- 577 [30] Pongrácz, P., Lenkei, R., Marx, A., Faragó, T. Should I whine or should I bark? Qualitative and  
578 quantitative differences between the vocalizations of dogs with and without separation-related  
579 symptoms. *Appl. Anim. Behav. Sci.* 2017,196:61-8.
- 580 [31] Rooney, N. J., Gaines, S. A., Bradshaw, J. W. Behavioural and glucocorticoid responses of dogs  
581 (*Canis familiaris*) to kennelling: investigating mitigation of stress by prior habituation. *Physiol. Behav.*  
582 2007,92:847-54.
- 583 [32] Rehn, T., Keeling, L. J. The effect of time left alone at home on dog welfare. *Appl. Anim. Behav.*  
584 *Sci.* 2011,129:129-35.
- 585 [33] Solomon, R. L., Wynne, L. C. Traumatic avoidance learning: Acquisition in normal dogs.  
586 *Psychological Monographs: General and Applied.* 1953,67:1.
- 587 [34] Firnkes, A., Bartels, A., Bidoli, E., Erhard, M. Appeasement signals used by dogs during dog-  
588 human communication. *J. Vet. Behav.* 2017,19:35-44.
- 589 [35] Hekman, J. P., Karas, A. Z., Dreschel, N. A. Salivary cortisol concentrations and behavior in a  
590 population of healthy dogs hospitalized for elective procedures. *Appl. Anim. Behav. Sci.*  
591 2012,141:149-57.

- 592 [36] Quaranta, A., Siniscalchi, M., Vallortigara, G. Asymmetric tail-wagging responses by dogs to  
593 different emotive stimuli. *Curr. Biol.* 2007,17:R199-R201.
- 594 [37] Hasegawa, M., Ohtani, N., Ohta, M. Dogs' body language relevant to learning achievement.  
595 *Animals.* 2014,4:45-58.
- 596 [38] Huber, L., Range, F., Voelkl, B., Szucsich, A., Viranyi, Z., Miklosi, A. The evolution of imitation:  
597 what do the capacities of non-human animals tell us about the mechanisms of imitation?  
598 *Philosophical Transactions of the Royal Society B: Biological Sciences.* 2009,364:2299-309.
- 599 [39] Pongracz, P., Miklosi, A., Kubinyi, E., Gurobi, K., Topal, J., Csanyi, V. Social learning in dogs: the  
600 effect of a human demonstrator on the performance of dogs in a detour task. *Anim. Behav.*  
601 2001,62:1109-17.
- 602 [40] Horn, L., Huber, L., Range, F. The importance of the secure base effect for domestic dogs—  
603 evidence from a manipulative problem-solving task. *PLoS One.* 2013,8:e65296.
- 604 [41] Gácsi, M., Topál, J., Miklósi, A., Dóka, A., Csányi, V. Attachment behavior of adult dogs (*Canis*  
605 *familiaris*) living at rescue centers: Forming new bonds. *J. Comp. Psychol.* 2001,115:423-31.
- 606 [42] Miklósi, Á., Kubinyi, E., Topál, J., Gácsi, M., Virányi, Z., Csányi, V. A simple reason for a big  
607 difference: wolves do not look back at humans, but dogs do. *Curr. Biol.* 2003,13:763-6.
- 608 [43] Marshall-Pescini, S., Rao, A., Virányi, Z., Range, F. The role of domestication and experience in  
609 'looking back' towards humans in an unsolvable task. *Sci. Rep.* 2017,7:46636.
- 610 [44] Kuhne, F., Hoessler, J. C., Struwe, R. Affective behavioural responses by dogs to tactile human-  
611 dog interactions. *Berl. Munch. Tierarztl. Wochenschr.* 2012,125:371-8.
- 612 [45] Byosiere, S.-E., Espinosa, J., Smuts, B. Investigating the function of play bows in adult pet dogs  
613 (*Canis lupus familiaris*). *Behav. Processes.* 2016,125:106-13.
- 614 [46] Held, S. D., Špinka, M. Animal play and animal welfare. *Anim. Behav.* 2011,81:891-9.
- 615 [47] Odendaal, J. An ethological approach to the problem of dogs digging holes. *Appl. Anim. Behav.*  
616 *Sci.* 1997,52:299-305.
- 617 [48] Beerda, B., Schilder, M. B. H., Van Hooff, J. A. R. A. M., De Vries, H. W., Mol, J. A. Chronic stress in  
618 dogs subjected to social and spatial restriction. I. Behavioral responses. *Physiol. Behav.* 1999,66:233-  
619 42.
- 620 [49] Walker, J. K., Waran, N. K., Phillips, C. J. The effect of conspecific removal on the behaviour and  
621 physiology of pair-housed shelter dogs. *Appl. Anim. Behav. Sci.* 2014,158:46-56.
- 622 [50] Hagen, K., Broom, D. M. Emotional reactions to learning in cattle. *Appl. Anim. Behav. Sci.*  
623 2004,85:203-13.
- 624 [51] Russell, J. A., Barrett, L. F. Core affect, prototypical emotional episodes, and other things called  
625 emotion: dissecting the elephant. *J. Pers. Soc. Psychol.* 1999,76:805.
- 626 [52] Mendl, M., Burman, O. H., Paul, E. S. An integrative and functional framework for the study of  
627 animal emotion and mood. *Proc. R. Soc. Lond. B. Biol. Sci.* 2010,277:2895-904.
- 628 [53] Kenkel, W. M., Paredes, J., Lewis, G. F., Yee, J. R., Pournajafi-Nazarloo, H., Grippo, A. J., et al.  
629 Autonomic substrates of the response to pups in male prairie voles. *PLoS One.* 2013,8:e69965.
- 630 [54] von Rosenberg, W., Chanwimalueang, T., Adjei, T., Jaffer, U., Goverdovsky, V., Mandic, D. P.  
631 Resolving ambiguities in the LF/HF ratio: LF-HF scatter plots for the categorization of mental and  
632 physical stress from HRV. *Front. Physiol.* 2017,8:360.
- 633 [55] Sacha, J. Why should one normalize heart rate variability with respect to average heart rate.  
634 *Front. Physiol.* 2013,4:306.
- 635 [56] Berntson, G. G., Cacioppo, J. T., Quigley, K. S. Autonomic determinism: the modes of autonomic  
636 control, the doctrine of autonomic space, and the laws of autonomic constraint. *Psychol. Rev.*  
637 1991,98:459.
- 638 [57] Zebunke, M., Langbein, J., Manteuffel, G., Puppe, B. Autonomic reactions indicating positive  
639 affect during acoustic reward learning in domestic pigs. *Anim. Behav.* 2011,81:481-9.
- 640 [58] Csikszentmihalyi, M., Csikszentmihalyi, I. *Beyond boredom and anxiety: Jossey-Bass San*  
641 *Francisco; 1975.*
- 642 [59] Csikszentmihalyi, M., LeFevre, J. Optimal experience in work and leisure. *J. Pers. Soc. Psychol.*  
643 1989,56:815.

- 644 [60] Peifer, C., Schulz, A., Schächinger, H., Baumann, N., Antoni, C. H. The relation of flow-experience  
645 and physiological arousal under stress—can u shape it? *J. Exp. Soc. Psychol.* 2014,53:62-9.
- 646 [61] Tozman, T., Magdas, E. S., MacDougall, H. G., Vollmeyer, R. Understanding the psychophysiology  
647 of flow: A driving simulator experiment to investigate the relationship between flow and heart rate  
648 variability. *Comput. Human Behav.* 2015,52:408-18.

649
